# Supplementary material
Source: MDPI journal article supplement (https://www.mdpi.com/2673-7159/4/2/11)
Supplement: s1 [file s1]

Table S4 – Edaphic correlation results in Minas Gerais, Brazil. Al – Aluminum, AlSat – Saturated Aluminum, BSat – Saturated Base, BSum – Sum Base, Ca – Calcium, Carb – Carbon, CEC – Cation exchange capacity, H – Hydrogen, K – Potassium, KCl - Potassium chloride, Mg – Magnesium, N – Nitrogen, Na – Sodium, OM - Organic Matter, WpH – pH Water.

[illegible]
