# Supplementary material
Source: MDPI journal article supplement (https://www.mdpi.com/2673-7159/4/2/11)
Supplement: s1 [file s1]

Table S1: Occurrence records of the specimens considered in the study.

| Longitude                 | Latitude                  | Height | Local (City)                                    | Collection | ID     | Collector                                             |
|---------------------------|---------------------------|--------|-------------------------------------------------|------------|--------|-------------------------------------------------------|
| -<br>43.67613000000<br>00 | -<br>19.82237000000<br>00 | 1800m  | Serra do Espinhaço/<br>Serra da Piedade (Caeté) | NYBG       | 996934 | Irwin, HS                                             |
| -<br>43.66666700000<br>00 | -<br>19.81666700000<br>00 | -      | Serra da Piedade (Caeté)                        | BHCB       | 7152   | Braga, MMN                                            |
| -<br>43.66970062255<br>86 | -<br>19.87999916076<br>66 | -      | Serra da Piedade (Caeté)                        | BHCB       | 13349  | Braga, MMN                                            |
| -<br>43.56666700000<br>00 | -<br>19.91666700000<br>00 | 1700m  | Serra da Piedade (Caeté)                        | SPF        | 80807  | Harley, RM                                            |
| -<br>43.57000000000<br>00 | -<br>19.92000000000<br>00 | 1700m  | Serra da Piedade (Caeté)                        | RBGK       | 251299 | Harley, RM; et al                                     |
| -<br>43.57000000000<br>00 | -<br>19.92000000000<br>00 | 1700m  | Serra da Piedade (Caeté)                        | RBGK       | 251300 | Harley, RM; et al                                     |
| -<br>44.21666700000<br>00 | -<br>20.13333300000<br>00 | 1400m  | Serra da Calçada (Brumadinho)                   | SPF        | 87262  | Martens, LA                                           |
| -<br>44.21666700000<br>00 | -<br>20.13333300000<br>00 | 1400m  | Serra da Calçada (Brumadinho)                   | SPF        | 87261  | Martens, LA                                           |
| -<br>43.66970062255<br>86 | -<br>19.87999916076<br>66 | 1500m  | (Caeté)                                         | HRCB       | 13469  | Taylor, NP                                            |
| -<br>43.66970062255<br>86 | -<br>19.87999916076<br>66 | 1500m  | Estrada para o Santuário da Piedade (Caeté)     | BHCB       | 20964  | Taylor, NP;<br>Zappi, DC                              |
| -<br>43.66970062255<br>86 | -<br>19.87999916076<br>66 | 1480m  | Serra da Piedade (Caeté)                        | ESA        | 27909  | Souza, VC;<br>Souza, JP;<br>Scalon, VR;<br>Campos, FJ |
| -<br>43.84669876098<br>63 | -<br>19.98559951782<br>23 | 1350m  | Serra do Rola Moça (Nova                        | ESA        | 122054 | Vincent, RC                                           |

|                |                |       |             |         |        |            |
|----------------|----------------|-------|-------------|---------|--------|------------|
| -              | -              | -     | Lima)       |         |        |            |
| 43.93780136108 | 19.92079925537 |       | Serra da    | HEPH    | 22212  | Salles,    |
| 40             | 11             |       | Moeda/Zo    |         |        | AEH; et al |
|                |                |       | na da       |         |        |            |
|                |                |       | Mata (Belo  |         |        |            |
|                |                |       | Horizonte)  |         |        |            |
| -              | -              | 1490m | P. E. Serra | -       | -      | Cheib, A   |
| 43.00500000000 | 20.05780000000 |       | do Rola     |         |        |            |
| 00             | 00             |       | Moça        |         |        |            |
|                |                |       | (Nova       |         |        |            |
|                |                |       | Lima)       |         |        |            |
| -              | -              | 887m  | Serra da    | BHCB    | 112827 | Cheib, A   |
| 44.57861100000 | 19.68444400000 |       | Piedade     |         |        |            |
| 00             | 00             |       | (Caeté)     |         |        |            |
| -              | -              | 1340m | Pico        | BHCB    | 116374 | Carmo,     |
| 44.36216700000 | 20.12138900000 |       | Itatiaiaçu  |         |        | FF; Cotta, |
| 00             | 00             |       | (Iguarapé)  |         |        | L          |
| -              | -              | 1361m | Pico        | BHCB    | 116376 | Carmo,     |
| 44.34097200000 | 20.12000000000 |       | Itatiaiaçu  |         |        | FF; Cotta, |
| 00             | 00             |       | (Iguarapé)  |         |        | L          |
| -              | -              | -     | Serra da    | CVJBFZB | 1438   | Carlos     |
| 43.66970000000 | 19.88000000000 |       | Piedade     |         |        | Alberto F. |
| 00             | 00             |       | (Caeté)     |         |        | Jr;        |
|                |                |       |             |         |        | Alysson    |
|                |                |       |             |         |        | Rezende    |
| -              | -              | -     | Serra da    | CVJBFZB | 1439   | Carlos     |
| 43.66970000000 | 19.88000000000 |       | Piedade     |         |        | Alberto F. |
| 00             | 00             |       | (Caeté)     |         |        | Jr;        |
|                |                |       |             |         |        | Alysson    |
|                |                |       |             |         |        | Rezende    |
| -              | -              | 1423m | Retiro das  | BHCB    | 165696 | Souza, FS; |
| 43.99138900000 | 20.07722200000 |       | Pedras      |         |        | Tomich, S; |
| 00             | 00             |       | (Nova       |         |        | Miranda,   |
|                |                |       | Lima)       |         |        | E;         |
|                |                |       |             |         |        | Machado,   |
|                |                |       |             |         |        | TM         |
| -              | -              | 1527m | Mina        | BHCB    | 165558 | Souza, FS; |
| 43.95416700000 | 20.09750000000 |       | Capitão do  |         |        | Tomich, S; |
| 00             | 00             |       | Mato        |         |        | Miranda,   |
|                |                |       | (Nova       |         |        | E;         |
|                |                |       | Lima)       |         |        | Machado,   |
|                |                |       |             |         |        | TM         |
| -              | -              | 1404m | Mina        | BHCB    | 168175 | Souza, FS; |
| 43.96055600000 | 20.09000000000 |       | Capitão do  |         |        | Tomich, S; |
| 00             | 00             |       | Mato        |         |        | Miranda,   |
|                |                |       | (Nova       |         |        | E;         |
|                |                |       | Lima)       |         |        | Machado,   |
|                |                |       |             |         |        | TM         |
| -              | -              | 1241m | Serra       | BHCB    | 182043 | Vidal, CV  |
| 44.00000000000 | 21.07485600000 |       | Azul/Serra  |         |        |            |
| 00             | 00             |       | das         |         |        |            |

|                      |                      |       |                                                                                  |      |        |                                                  |
|----------------------|----------------------|-------|----------------------------------------------------------------------------------|------|--------|--------------------------------------------------|
| -                    | -                    | 1470m | Farofas<br>(São<br>Joaquim<br>de Bicas)<br>Serra da<br>Moeda<br>(Brumadin<br>ho) | BHCB | 190738 | Souza,<br>JAM;<br>Correia,<br>DR; Silva,<br>SHA  |
| 43.98805600000<br>00 | 20.12305600000<br>00 |       |                                                                                  |      |        |                                                  |
| -                    | -                    | 1442m | RPPN<br>Poço<br>Fundo<br>(Congonha<br>s)                                         | BHCB | 190764 | Souza,<br>JAM;<br>Correia,<br>DR; Silva,<br>SHA  |
| 43.89972200000<br>00 | 20.43444400000<br>00 |       |                                                                                  |      |        |                                                  |
| -                    | -                    | 1206m | RPPN<br>Faria<br>(Congonha<br>s)                                                 | BHCB | 190772 | Paiva,<br>JAM;<br>Silva, E;<br>Rodrigues<br>, GS |
| 43.86000000000<br>00 | 20.44583300000<br>00 |       |                                                                                  |      |        |                                                  |
| -                    | -                    | -     | Pico do<br>Itabirito<br>(Itabirito)                                              | BHCB | 24108  | s.n.                                             |
| 43.80139923095<br>70 | 20.25329971313<br>48 |       |                                                                                  |      |        |                                                  |
| -                    | -                    | -     | Serra do<br>Curral<br>(Belo<br>Horizonte)                                        | BHCB | 37421  | s.n.                                             |
| 43.93780136108<br>40 | 19.92079925537<br>11 |       |                                                                                  |      |        |                                                  |
| -                    | -                    | -     | Mina Casa<br>de Pedra -<br>CSN<br>(Congonha<br>s)                                | BHCB | 107323 | Mendes,<br>MS; Brina,<br>AE                      |
| 43.85779953002<br>92 | 20.49970054626<br>46 |       |                                                                                  |      |        |                                                  |
| -                    | -                    | -     | Áreas de<br>Proteção<br>Especial<br>Rio Manso<br>e Serra<br>Azul<br>(Itatiaçu)   | -    | -      | -                                                |
| 44.34349000000<br>00 | 20.12083300000<br>00 |       |                                                                                  |      |        |                                                  |
| -                    | -                    | -     | P. E. Serra<br>do Rola<br>Moça<br>(Nova<br>Lima)                                 | -    | -      | -                                                |
| 44.00580800000<br>00 | 20.05729500000<br>00 |       |                                                                                  |      |        |                                                  |
| -                    | -                    | -     | Área de<br>Proteção<br>Ambiental<br>Sul (Nova<br>Lima)                           | -    | -      | -                                                |
| 43.95487000000<br>00 | 20.09779700000<br>00 |       |                                                                                  |      |        |                                                  |
| -                    | -                    | -     | Monumen<br>to Natural<br>Serra da                                                | -    | -      | -                                                |
| 43.94981900000<br>00 | 20.28369600000<br>00 |       |                                                                                  |      |        |                                                  |

|                |                |       |                  |         |      |          |
|----------------|----------------|-------|------------------|---------|------|----------|
| -              | -              | -     | Moeda<br>(Moeda) | -       | -    | -        |
| 43.90016300000 | 20.29258000000 | -     | Estação          | -       | -    | -        |
| 00             | 00             | -     | Ecológica        | -       | -    | -        |
| -              | -              | -     | de Arêdes        | -       | -    | -        |
| 43.68867200000 | 19.82265000000 | -     | (Itabirito)      | -       | -    | -        |
| 00             | 00             | -     | Monumen          | -       | -    | -        |
| -              | -              | -     | to Natural       | -       | -    | -        |
| 43.93780136108 | 19.92079925537 | -     | Serra da         | -       | -    | -        |
| 40             | 11             | -     | Piedade          | -       | -    | -        |
| -              | -              | 1377m | (Caeté)          | -       | -    | -        |
| 43.93780136108 | 19.92079925537 | 1377m | Parque do        | CVJBFZB | 4026 | Gonzaga, |
| 40             | 11             | 1377m | Paredão/S        | CVJBFZB | 4026 | DR;      |
| -              | -              | 1377m | erra do          | CVJBFZB | 4026 | Ferreira |
| -              | -              | 1377m | Curral           | CVJBFZB | 4026 | Jr., CA  |
| -              | -              | 1377m | (Belo            | CVJBFZB | 4026 | -        |
| -              | -              | 1377m | Horizonte)       | CVJBFZB | 4026 | -        |

---
