# Supplementary material
Source: MDPI journal article supplement (https://www.mdpi.com/2673-7159/4/2/11)
Supplement: s1 [file s1]

Table S3: Edaphic variables (soil) from the IBGE database.

| Edaphic variables | Description              |
|-------------------|--------------------------|
| Alsat             | Aluminum saturation      |
| Al                | Aluminum                 |
| sand              | Sand                     |
| clay              | Clay                     |
| Bsat              | Base saturation          |
| Bsum              | Base sum                 |
| Ca                | Calcium                  |
| C                 | Organic carbon           |
| cec               | Cation exchange capacity |
| H                 | Exchangeable hydrogen    |
| Mg                | Magnesium                |
| om                | Natural organic matter   |
| N                 | Nitrogen                 |
| pHwater           | Water pH                 |
| pHKCl             | KCl pH                   |
| K                 | Potassium                |
| silt              | Silt                     |
| Na                | Sodium                   |
