# Supplementary material
Source: MDPI journal article supplement (https://www.mdpi.com/2673-7159/4/2/11)
Supplement: s1 [file s1]

Table S2: Bioclimatic variables from the Worldclim database.

| Bioclimatic variables | Description                                                |
|-----------------------|------------------------------------------------------------|
| BIO01                 | Annual Mean Temperature                                    |
| BIO02                 | Mean Diurnal Range (Mean of monthly (max temp - min temp)) |
| BIO03                 | Isothermality (BIO2/BIO7) ( $\times 100$ )                 |
| BIO04                 | Temperature Seasonality (standard deviation $\times 100$ ) |
| BIO05                 | Max Temperature of Warmest Month                           |
| BIO06                 | Min Temperature of Coldest Month                           |
| BIO07                 | Temperature Annual Range (BIO5-BIO6)                       |
| BIO08                 | Mean Temperature of Wettest Quarter                        |
| BIO09                 | Mean Temperature of Driest Quarter                         |
| BIO10                 | Mean Temperature of Warmest Quarter                        |
| BIO11                 | Mean Temperature of Coldest Quarter                        |
| BIO12                 | Annual Precipitation                                       |
| BIO13                 | Precipitation of Wettest Month                             |
| BIO14                 | Precipitation of Driest Month                              |
| BIO15                 | Precipitation Seasonality (Coefficient of Variation)       |
| BIO16                 | Precipitation of Wettest Quarter                           |
| BIO17                 | Precipitation of Driest Quarter                            |
| BIO18                 | Precipitation of Warmest Quarter                           |
| BIO19                 | Precipitation of Coldest Quarter                           |
| srad                  | Solar Radiation ( $\text{kJ m}^{-2} \text{day}^{-1}$ )     |
